# Supplementary material
Source: publisher figshare collection journal article supplement (https://geolsoc.figshare.com/ndownloader/files/27362781)
Supplement: Supplementary file 1 [file 27362781]

## Sheet: Sheet1
Sample	Stratigraphic unit	Lithology	Hight (m)	δ13C (PDB, %)	δ18O (PDB, %)
MD 128	Maidiping Formation	Dolostone	31.1	2.1048	-8.29719
MD 127	Maidiping Formation	Dolostone	30.3	0.825125	-9.81238
MD 125	Maidiping Formation	Dolostone	29.5	0.989327	-8.71788
MD 124	Maidiping Formation	Dolostone	28.8	2.35572	-9.39133
MD 123	Maidiping Formation	Dolostone	28.3	2.25393	-9.32249
MD 122	Maidiping Formation	Dolostone	27.3	2.19612	-9.23149
MD 121	Maidiping Formation	Dolostone	26.5	1.87534	-9.48596
MD120a	Maidiping Formation	Dolostone	25	-0.135083	-9.77916
MD 119a	Maidiping Formation	Dolostone	24.8	0.0834349	-9.47441
MD 116	Maidiping Formation	Dolostone	24.2	0.245917	-8.88574
MD 112	Maidiping Formation	Dolostone	23.6	0.954125	-8.47127
MD 111	Maidiping Formation	Dolostone	23.35	2.12384	-8.67359
MD 129	Maidiping Formation	Dolostone	22.1	-1.34707	-10.0239
MD 130	Maidiping Formation	Dolostone	20.7	0.0172237	-8.63712
MD 131	Maidiping Formation	Dolostone	20.2	-0.251905	-9.08442
MD 132	Maidiping Formation	Dolostone	19.2	-1.56313	-9.06479
MD 133	Maidiping Formation	Dolostone	18.7	-1.09829	-8.8667
MD 134	Maidiping Formation	Conglomeratic dolostone	17.8	-0.954396	-8.11824
MD 136	Maidiping Formation	Dolostone	16.6	-1.01259	-8.83545
MD 137	Maidiping Formation	Phosphatic dolostone	15.9	-2.30936	-8.63323
MD 138	Maidiping Formation	Dolostone	15.3	-2.0761	-8.6642
MD 139	Maidiping Formation	Phosphatic dolostone	14.6	-2.12347	-8.65282
MD 142	Maidiping Formation	Dolostone	13.6	-1.87438	-8.8254
MD141	Maidiping Formation	Dolostone	12.3	-2.23334	-9.32696
MD146M	Maidiping Formation	Dolostone	11.7	-1.59722	-7.25056
MD 148	Maidiping Formation	Phosphatic dolostone	10.1	-0.404456	-8.06412
MD 149	Maidiping Formation	Phosphatic dolostone	8.7	-0.683776	-10.069
MD 151	Maidiping Formation	Phosphatic dolostone	8	-0.886464	-8.22433
MD153	Maidiping Formation	Phosphatic dolostone	6.95	-0.860828	-7.33203
MD 154	Maidiping Formation	Phosphatic dolostone	6	-1.27664	-9.10825
MD 155	Maidiping Formation	Phosphatic dolostone	5.15	-1.2808	-8.33381
MD 156	Maidiping Formation	Phosphatic dolostone	4.45	-1.50842	-8.06416
MD 158	Maidiping Formation	Phosphatic dolostone	2.5	-0.893646	-8.27327
MD 157	Maidiping Formation	Phosphatic dolostone	1.2	-1.02813	-9.12509
MD220	Maidiping Formation	Phosphatic dolostone	1.05	-1.07527	-7.91871
MD159	Maidiping Formation	Phosphatic dolostone	0.9	-1.1944	-7.29859
MD222M	Maidiping Formation	Phosphatic dolostone	0.6	-1.30664	-7.46602
MD 161 matrix	Maidiping Formation	Phosphatic dolostone	0	-1.07927	-8.32605
MD 160 matrix	Dengying Formation	Dolostone	-1.8	-0.890867	-8.00503
MD209	Dengying Formation	Dolostone	-2.7	-1.30221	-7.63567
MD223	Dengying Formation	Dolostone	-4.9	-1.46459	-7.68793
MD210	Dengying Formation	Dolostone	-17.6	0.131755	-7.79142
MD211	Dengying Formation	Dolostone	-18.4	0.286833	-4.78904
MD212	Dengying Formation	Dolostone	-19	0.210579	-7.60052
MD213	Dengying Formation	Dolostone	-19.85	-0.261794	-7.51964
MD214M	Dengying Formation	Dolostone	-20.9	0.579283	-6.92688
MD215	Dengying Formation	Dolostone	-22.2	0.823503	-5.84916
MD216	Dengying Formation	Dolostone	-23.7	0.906195	-5.58281
MD217	Dengying Formation	Dolostone	-25.7	0.711819	-7.07777
MD218	Dengying Formation	Dolostone	-29	0.845926	-5.33517
